# Supplementary material for: Framework isomers controlled by the speed of crystallization: different aggregation fashions of Zn(ii) and 1,2,4-triazol-3-amine, distinct (3,4)-connected self-penetrating nets, and various pore shapes
Source: Royal Society of Chemistry journal article supplement (doi:10.1039/c3dt51454d), 2013-01-01
Supplement: c3dt51454d.pdf [file c3dt51454d.pdf]

## Supporting Information

### Framework isomers controlled by the speed of crystallization: different aggregation fashions of Zn(II) and 1,2,4-Triazol-3-amine, distinct (3,4)-connected self-penetrating nets, and various pore shapes

Ming-biao Luo, Zi-zun Yuan, Wen-yuan Xu, Feng Luo, Jian-qiang Li, Yan Zhu, Xue-feng Feng, and Shu-juan Liu

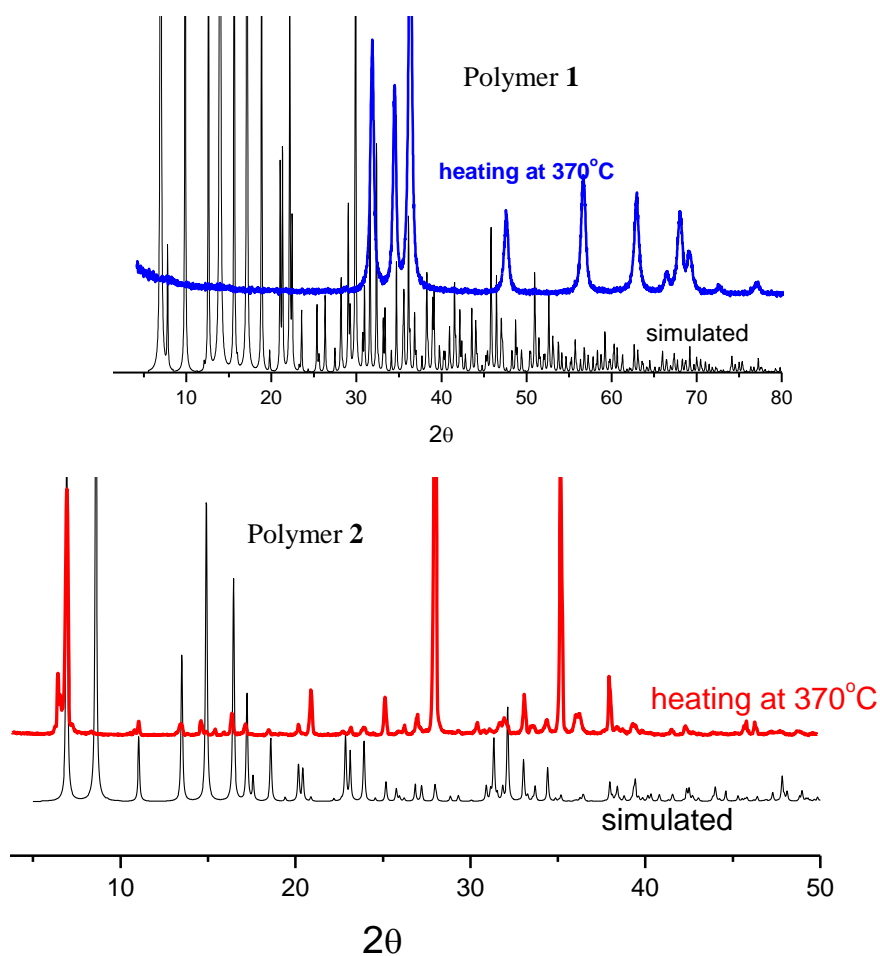

**Figure S1.** The XRD patterns after the samples heated at 370°C for one day and the XRD patterns simulated from the single crystal data.
